# Supplementary material for: Integrating ATAC-seq and RNA-seq Reveals the Dynamics of Chromatin Accessibility and Gene Expression in Apple Response to Drought
Source: MDPI journal article supplement (doi:10.3390/ijms231911191), 2022-09-23
Supplement: s1 [file s1]

Figure S1: The Spearman Correlation of all six samples; Figure S2: Distribution of other four samples' ATAC signals in the TSS region. Bin = 1; Figure S3: The enrichment of genes related to down-regulated DARs; Figure S4: The RT-qPCR results of selected ATP-dependent chromatin remodeling ATPases; Figure S5: The supplementary result of RNA-seq and the overlap of DEGs and drought-specific THSs; Figure S6: The expression pattern of the overlap of DEGs and DARs, PEIGs, and the overlap of drought-specific THSs and DEGs; Figure S7: The RT-qPCR results of selected ATP-dependent chromatin remodeling ATPase; Table S1: DGL3\_vs\_GL3\_DARs; Table S2: Four-quadrant plot related genes and PEIGs; Table S3: GO enrichment of the overlap in drought-specific THSs and DEGs; Table S4: GO enrichment of transcription related DEGs in co-expression network; Table S5: Primers and RT-qPCR result; Table S6: FPKM of mRNAs; Table S7: The quality of data in the manuscript; Table S8: The connection in the co-expression network of DEGs.
